# Supplementary material
Source: HighWire-hosted journal article supplement (https://www.rcpjournals.org/highwire/filestream/7154/field_highwire_adjunct_files/0/CMJ1501-Subbe_App_2.pdf)
Supplement: CMJ1501-Subbe_App_2.pdf [file CMJ1501-Subbe_App_2.pdf]

## Supplementary material

### Appendix 2. Acknowledgement of colleagues involved in reviewing the study outline, collecting data and collating results of SAMBA '13.

The authors would like to thank the over 100 colleagues from across the UK who joined SAMBA '13 in reviewing the study outline, collecting data and collating results: Ysbyty Gwynedd, Bangor: Lenny Latip, Mohsin Zafarawam; Basingstoke and North Hampshire Hospital, Basingstoke: Sebastien Ellis, Jaz Bhullar; Royal Victoria Hospital, Belfast: Mark Roberts; University Hospital Birmingham NHS Trust, Queen Elizabeth Hospital Birmingham: Mohammed Akber; Heart of England NHS Foundation, Heartlands Hospital, Birmingham: Philip Dyer; Royal Bolton Hospitals NHS Foundation Trust, Bolton: Simon Irving; BSUH NHS Trust, Royal Sussex County Hospital, Brighton: Wendy Munro; University Hospitals Bristol NHS Foundation Trust, Bristol Royal Infirmary, Bristol: Anna Stevenson; West Suffolk Hospital NHS Trust, Bury St Edmunds: Mark Cranston, Joseph Yikona; Mid-Essex Hospitals NHS Trust, Broomfield Hospital, Chelmsford: Aung Lwin, Matthew Farrant; Gloucestershire NHS Foundation Trust, Cheltenham General Hospital, Cheltenham: Stephan Birkner; Countess of Chester Hospital, Chester: Tapas Chakraborty, Sreemantula Gayatri; Chesterfield Royal Hospital Foundation Trust, Chesterfield: Tarek Sobka; Lancashire Teaching Hospitals NHS Trust, Chorley Hospital, Chorley: Faiyaz Mohammed, Khalilullah Wahdati; Mid Cheshire Hospitals Foundation Trust, Leighton Hospital, Crewe: Shirley Hammersley; Croydon University Hospital, Croydon: Radha Selvaratnam; Western Health and Social Care Trust, Altnagelvin Area Hospital, Derry: Eleanor Campbell; Mid Yorkshire, Dewsbury and District Hospital, Dewsbury: Tende Msimanga; Ninewells Hospital, Dundee: Alistair Douglas, Hugh Gifford, Katy Hill, Justin Garrett, Sunny Jabbal, Tani Abedin, Tim Heron; East Sussex Healthcare NHS Trust, Eastbourne District General Hospital, Eastbourne: Andrew Leonard, Petra Schinle, Pietro Garbelli; Northern Lincolnshire and Goole Hospitals NHS Foundation Trust, Diana Princess of Wales Hospital, Grimsby: Deepak Bhatia; Calderdale and Huddersfield NHS Trust, Calderdale Royal Hospital, Halifax: Nicholas Scriven, Andrew Hardy. North West London Hospitals NHS Trust, Northwick Park Hospital, Harrow: Jacob de Wolff; Queen Elizabeth Hospital, Kings Lynn: Dipankar Bhattacharjee, Eleanor Whidden, Eleni Mantzari, H Altemimi, Dr R Hariraj, SS Seshadri; Royal Liverpool Hospital, Liverpool: Bryan Renton; Royal Glamorgan Hospital, Llantrisant: Les Ala, John Hounsell; Chelsea and Westminster Hospital NHS Foundation Trust, Chelsea and Westminster Hospital, London: Derek Bell, Phillip Lee, Gary Davies; Central Manchester University Hospital, Manchester Royal Infirmary, Manchester: John Bright; University Hospital of South Manchester, Wythenshawe Hospital, Manchester: Jaydeep Mandal, Mark Edward Holland, Martin Patrick; Royal Gwent Hospital, Newport: Paul Mizen, Llifon Edwards; Nottingham University Hospitals NHS Trust, Queen's Medical Centre, Nottingham: Ivan Le Jeune, Claire Farrington; South East London NHS Trust, Princess Royal University Hospital, Orpington: Elisabetta Fabris; Oxford University Hospitals NHS Trust, John Radcliffe Hospital, Oxford: Matthew Giles; NHS Greater Glasgow & Clyde, Royal Alexandra Hospital, Paisley: Gautamananda Ray; Ysbyty Glan Clwyd, Rhyl: Aled Huws; Salford Royal, Salford: Nicola Cooper; North Lincolnshire and Goole Hospital NHS Trust, Scunthorpe General Hospital, Scunthorpe: Vijaykumar Singh, Abdul Hameed; University Hospital Southampton, Southampton: Chris Roseveare; University Hospital of North Staffordshire NHS Trust, Stoke on Trent: Zia Din; Heart of England Foundation Trust, Good Hope Hospital, Sutton Coldfield: Susan Fair; Great Western Hospitals NHS Trust, Swindon: Robert Hughes; Torbay Hospital: Helen Waters; Royal Hampshire Hospital, Winchester: Philip Swales, Umed Nadir, Verity Turner, Rhiannon John; Wirral University Teaching Hospital, Arrowe Park Hospital, Wirral: Vijdan Gani Abdul Majeed; Royal Wolverhampton Hospitals: Kate Willmer; South London Healthcare, Queen Elizabeth Hospital, Woolwich: David Ward.
